# Supplementary material
Source: PubMed Central journal article supplement (PMC6367021)
Supplement: NIHMS1516304-supplement-Supplemental_Information.pdf [file NIHMS1516304-supplement-Supplemental_Information.pdf]

# Supplementary Information for

## Super-Mendelian inheritance mediated by CRISPR/Cas9 in the female mouse germline

Hannah A. Grunwald<sup>1,†</sup>, Valentino M. Gantz<sup>1,†</sup>, Gunnar Poplawski<sup>2,†,‡</sup>, Xiang-ru S. Xu<sup>1</sup>, Ethan Bier<sup>1,3</sup>, Kimberly L. Cooper<sup>1,3,\*</sup>

### Affiliations:

<sup>1</sup>Division of Biological Sciences, Section of Cellular and Developmental Biology, University of California San Diego, La Jolla, California 92093, USA.

<sup>2</sup>Department of Neurosciences, University of California San Diego, La Jolla, California 92093, USA.

<sup>3</sup>Tata Institute for Genetics and Society, University of California San Diego, La Jolla, California 92093, USA.

\*Correspondence to: [kcooper@ucsd.edu](mailto:kcooper@ucsd.edu)

† Equal contributions

‡ Current address: Department of Medicine, National University of Singapore, Singapore 119228, Republic of Singapore.

### This PDF file includes:

|                                   |         |
|-----------------------------------|---------|
| Supplementary Methods.....        | page 2  |
| Supplementary Figures 1 to 5..... | page 4  |
| Supplementary Tables 1 to 4.....  | page 10 |

## Supplementary Methods

### Cloning of the *Tyrosinase*<sup>CopyCat</sup> transgene

All primers for cloning are listed in Supplementary Table 1. Using primers v851 and v852, we amplified a backbone for bacterial propagation that also contained a Human U6 promoter and gRNA scaffold. We amplified a second fragment of DNA that contained the CMV enhancer and promoter driving expression of the mCherry fluorophore from plasmid #548 (provided by Dr. Mark Tuszynski), using the primers v853 and v854. The two fragments were joined using the Gibson Assembly technique with reagents from New England Biolabs (NEB) (Cat.# E5520S) to obtain the plasmid pVG211, which carried all the components of the CopyCat except for the gRNA target sequence. To obtain the final transgene sequence, the *Tyrosinase* Exon 4 gRNA target (Tyr4a-gRNA) sequence was inserted by performing a plasmid primer mutagenesis using the primers v878 and v875 and the NEB Q5 Site-Directed Mutagenesis Kit (Cat.# E0554S) to obtain the pVG242 plasmid.

The Jackson Laboratory modified this plasmid to include homology arms for homologous recombination into the *Tyrosinase* locus (*Tyr*), precisely at the Tyr4a-gRNA target cut site. This donor plasmid was then used to introduce the targeting vector into the *Tyr* locus by pronuclear injection into zygotes of the C57BL/6J strain. Briefly, the Jackson Laboratory purchased capped Cas9 mRNA from Trilink for co-injection at 60 ng/ul together with 25-50 ng/ul of guide RNA (Tyr4a-gRNA target sequence: 5'-GTTATGGCCGATAGGTGCAT-3') and 10-20 ng/ul of the donor plasmid. The resulting founders were backcrossed, and offspring were screened for germline transmission. The inserted transgene is represented below (Supplementary Fig. 1, 2).

### *Tyrosinase*<sup>CopyCat</sup> transgene sequence

Below is displayed the sequence of the **transgene in blue**, inserted into the mouse genome (underlined sequences).

>Tyrosinase CopyCat Exon 4

```
TATTTTTGAACAATGGCTGCGAAGGCACCGCCCTCTTTTGGAAAGTTACCCAGAAGCCAATGCCATAG
AGCCCACCGCATCCCAGCATGCCTGCTATTGTCTTCCCAATCCTCCCCCTTGCTGTCTGCCCCACCC
ACCCCCAGAATAGAATGACACCTACTCAGACAATGCGATGCAATTCCTCATTATTTATTAGGAAAGGA
CAGTGGGAGTGGCACCTTCCAGGGTCAAGGAAGGCACGGGGGAGGGGCAAACAACAGATGGCTGGC
AACTAGAAGGCACAGTCGAGGCTGATCAGCGAGCTCTAGCATTTAGGTGACACTATAGAATAGGGCC
CTCTAGATGCATGCTCGAGCGGCCAGTGTGATGGATATCTGCAGAATTCTTACTTGTACAGCTCGT
CCATGCCGCCGGTGGAGTGGCGGCCCTCGGCGCGTTCGTACTGTTCCACGATGGTGTAGTCTCGTTGT
GGGAGGTGATGTCCAACCTTGATGTTGACGTTGTAGGCGCCGGGAGCTGCACGGGCTTCTTGGCCTTG
TAGGTGGTCTTGACCTCAGCGTCGTAGTGGCCGCCGTCCTTCAGCTTCAGCCTCTGCTTGATCTGCCC
TTCAGGGCGCCGTCCTCGGGGTACATCCGCTCGGAGGAGGCCTCCCAGCCCATGGTCTTCTTCTGCATT
ACGGGGCCGTCGGAGGGGAAGTTGGTGCCGCGCAGCTTCACCTTGTAGATGAACTCGCCGTCCTGCAG
GGAGGAGTCTGGGTCACGGTCACCACGCCGCGTCTCGAAGTTCATCACGCGTCCCACCTGAAGC
CCTCGGGGAAGGACAGCTTCAAGTAGTCGGGGATGTCGGCGGGGTGCTTCACGTAGGCCTTGGAGCCG
TACATGAACTGAGGGGACAGGATGTCCCAGGCGAAGGGCAGGGGGCCACCCTTGGTACCTTCAGCTT
GGCGGTCTGGGTGCCCTCGTAGGGGCGGCCCTCGCCCTCGCCCTCGATCTCGAACTCGTGGCCGTTAC
GGAGCCCTCCATGTGCACCTTGAAGCGCATGAACTCCTTGATGATGGCCATGTTATCCTCCTCGCCCTT
GCTCACCATGGTGGCGGGATCCGAGCTCGGTACCAAGCTTGGGTCTCCCTATAGTGAGTCGTATTAATT
TCGATAAGCCAGTAAGCAGTGGGTTCTCTAGTTAGCCAGAGAGCTCTGCTTATATAGACCTCCCACCG
TACACGCCTACCGCCATTTGCGTCAATGGGGCGGAGTTGTTACGACATTTTGGAAAGTCCCCTTGATT
TTGGTGCCAAAACAACTCCCATTGACGTCAATGGGGTGGAGACTTGGAAATCCCCGTGAGTCAAACC
GCTATCCACGCCCATTTGATGTAAGTCCAAAACCGCATCACCATGGTAATAGCGATGACTAATACGTAG
ATGTAAGTCCAAAGTAGGAAAGTCCATAAGGTCATGTAAGTGGGCATAATGCCAGGCGGGCCATTTACC
```

GTCATTGACGTCAATAGGGGGCGTACTTGGCATATGATACACTTGATGTACTGCCAAGTGGGCAGTTT  
ACCGTAAATACTCCACCCATTGACGTCAATGGAAAGTCCCTATTGGCGTTACTATGGGAACATACGTC  
ATTATTGACGTCAATGGGCGGGGGTCTGTTGGGCGGTCAGCCAGGCGGGCCATTTACCGTAAGTTATGT  
AACGCGGAACCTCCATATATGGGCTATGAACTAATGACCCCGTAATTGATTACTATTAATAACTAGTCA  
ATAATCAATGTCCAGCTAGCAGAGGGCCTATTTCCCATGATTCCTTCATATTTGCATATACGATACAA  
GGCTGTTAGAGAGATAATTGGAATTAATTTGACTGTAAACACAAAGATATTAGTACAAAATACGTGAC  
GTAGAAAGTAATAATTTCTTGGGTAGTTTGCAGTTTTAAAATTATGTTTTAAAATGGACTATCATATGC  
TTACCGTAACTTGAAAGTATTTTCGATTTCTTGGCTTTATATATCTTGTGGAAAGGACGAAACACCGTTA  
TGGCCGATAGGTGCATGTTTTAGAGCTAGAAAATAGCAAGTTAAAATAAAGGCTAGTCCGTTATCAACTT  
GAAAAAGTGGCACCGAGTCGGTGCTTTTTACATCAGGTTGTTTTCTGTTTTTACATCAGGTTGTTTTTC  
TGTTTGGTTTTTTTTTTTACACCACGTTTATACGCCGGTGCACGGTTTACCCTGAAAACACCTATCGGGC  
ATAACAGAGACTCTTACATGGTTCCTTTCATACCGCTCTATAGAAATGGTGATTTCTTCATAACATCCA  
AGGATCTGGGATATGACTACAGCTACCTCCAAGAGTCAG

### Mouse care

Mouse stocks used in this study are listed in Supplementary Table 2. All mice were housed in accordance with UCSD Institutional Animal Care and Use Committee protocols and fed on a standard breeders diet. Adult males and females were used for breeding.

### DNA extraction

We obtained <5 mm of tail tissue from each mouse between birth and postnatal day 21 for genotyping. We sealed tail wounds with KwikStop Stypic Powder. We then screened tails for expression of mCherry using a fluorescent dissecting microscope. We submerged tails in 500 uL of TNES buffer (10mM Tris, pH 7.5; 400mM NaCl; 100 mM EDTA; 0.6% SDS) with 3 uL of 10 mg/mL Proteinase K and digested overnight (8-20 hr) in a 56°C water bath. We then added 139 uL of 6 M NaCl to each sample, vortexed, and centrifuged for 10 minutes at 14,000g at room temperature. We transferred supernatant to a clean tube and precipitated DNA by adding 700 uL ice-cold 95% EtOH and placing samples overnight at -20°C. We pelleted the precipitated DNA by centrifugation at 14,000g for 10 minutes at 4°C. We washed the pelleted DNA with ice-cold 70% EtOH and allowed it to air-dry before resuspension in TE.

### PCR reactions

We performed PCR using either Bioline Red MyTaq MasterMix or NEB Q5 2X MasterMix (if the product was to be submitted for Sanger sequencing) with the following recipes and cycling parameters.

Bioline Red MyTaq: 1X MasterMix, 0.5 uM primers, 1 uL DNA (between 10-200 ng DNA) in 20 uL with the following cycle parameters. “n” represents the annealing temperature, and “q” represents the elongation time; each is designated in Supplementary Table 3.

95°C for 3’

30 repeats of 95°C for 15”, n°C for 15”, 72°C for q”

72°C for 5’

10°C for ∞

NEB Q5: 1X MasterMix, 0.5 uM primers, 1 uL DNA (between 10-200 ng DNA) in 50 uL

98°C for 30”

35 repeats of 98°C for 30”, 64°C for 30”, 72°C for 3’

72°C for 5’

10°C for ∞

### Gel purification

We ran samples on 1-2% agarose gels to separate bands. Representatives of each genotyping reaction are shown in Supplementary Fig. 3. Non-homologous end joining (NHEJ) amplicons or *Tyr<sup>ch</sup>* amplicons were gel extracted using a QiaQuick Gel Extraction Kit as instructed. We submitted purified DNA for Sanger sequencing using the amplification primers noted in Supplementary Table 3.

### Blinded genotyping of F3 constitutive and F4 germline conditional offspring

The researcher did not have information about the status of mCherry fluorescence or coat color when exon 4 and exon 5 were independently amplified from each tail tip DNA sample. Presence or absence of the *Tyr<sup>CopyCat</sup>* allele (higher molecular weight band) and presence or absence of the *Tyr<sup>Chinchilla</sup>* SNP (determined from Sanger sequence trace) was documented separately for each individual and then merged to annotate the genotype at both sites. Randomization was not appropriate for this work.

## Supplementary Figures

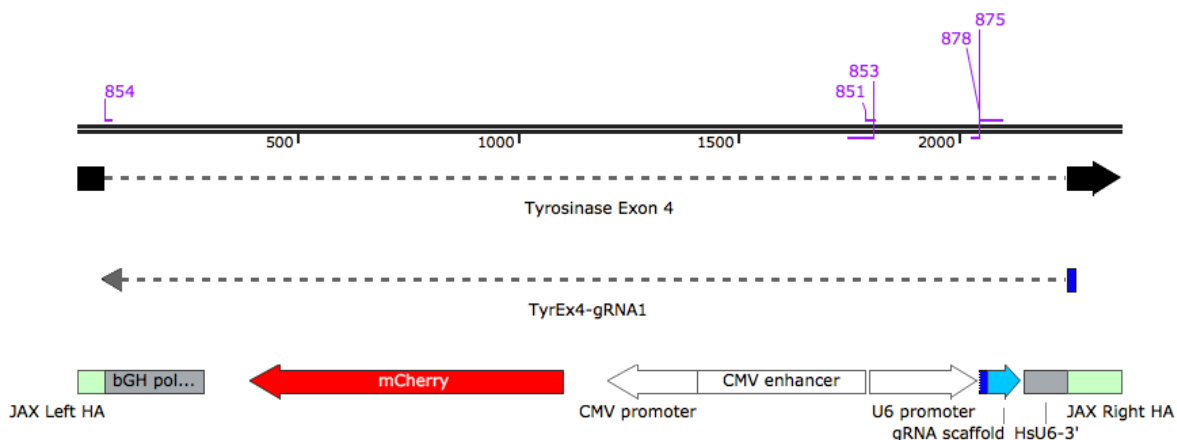

### Supplementary Fig. 1.

**The *Tyrosinase* Exon 4 “CopyCat” transgene that was inserted into the mouse genome by homologous recombination.** As a visible marker of inheritance, the knock in allele carries a CMV Enhancer and Promoter-driven *mCherry* transgene with a bovine growth hormone polyadenylation signal (bGH poly[A]). A Human U6 Promoter (and downstream sequence) controls the transcription of the gRNA (*Tyr4a-gRNA*) in reverse orientation.



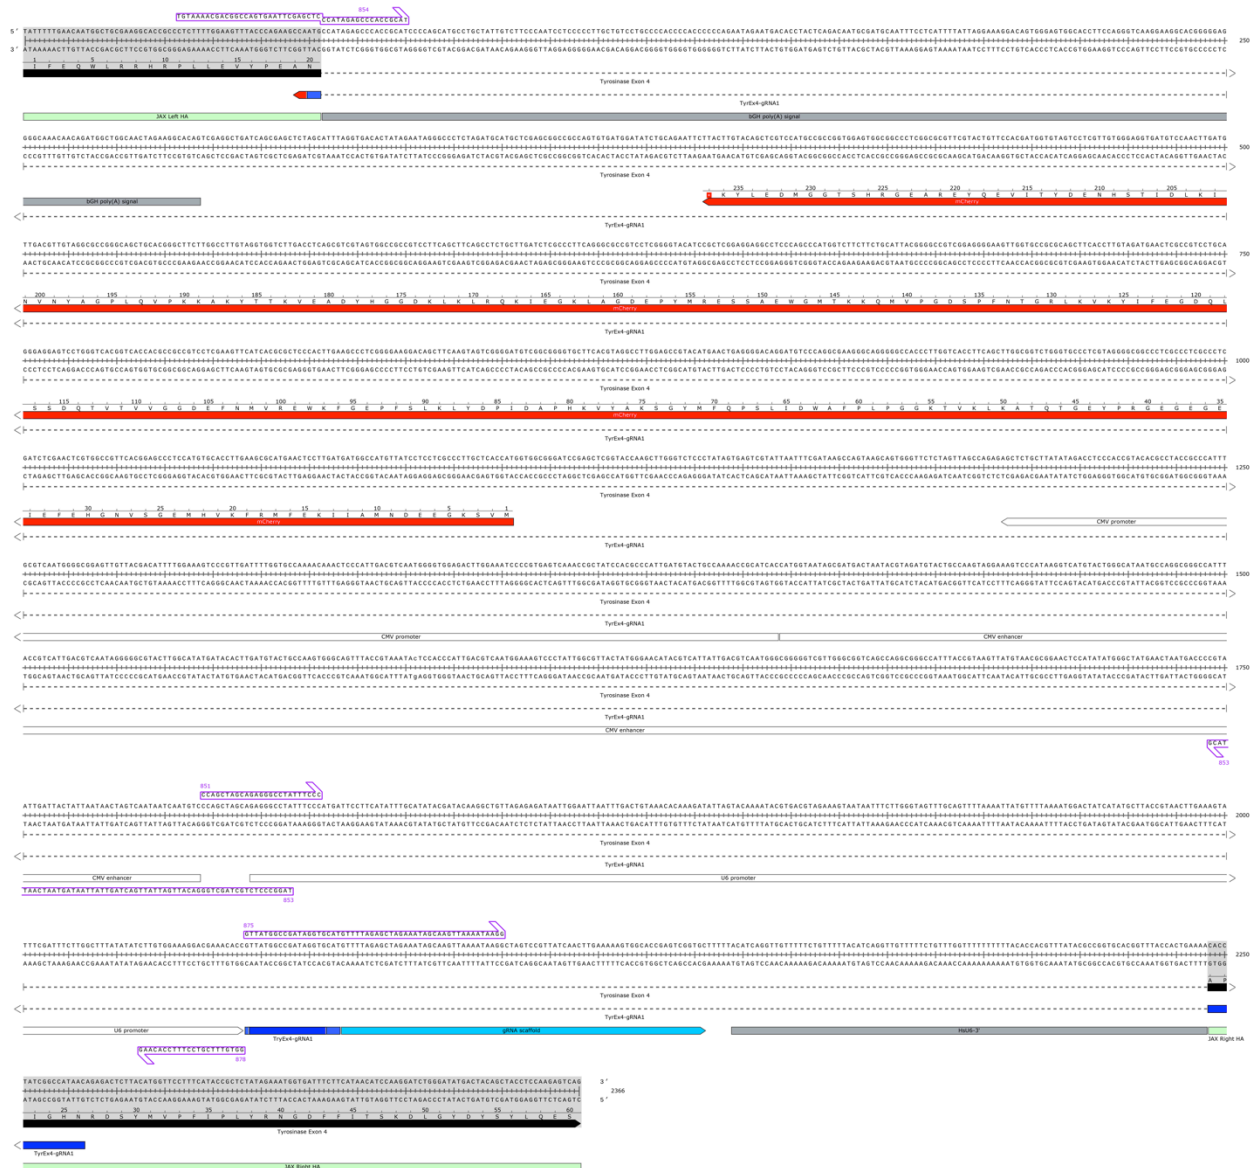

Supplementary Fig. 2.

Sequence annotation of the *Tyr<sup>CopyCat</sup>* transgene after insertion into *Tyr* Exon 4 in the mouse genome. The flanking sequence of Exon 4 is represented as shaded in grey. Each of the primers used for the cloning this transgene is shown in purple. Dark blue annotations in the right and left homology arms (HA) show the disrupted target site for the *Tyr4a-gRNA* that is encoded in this transgene.

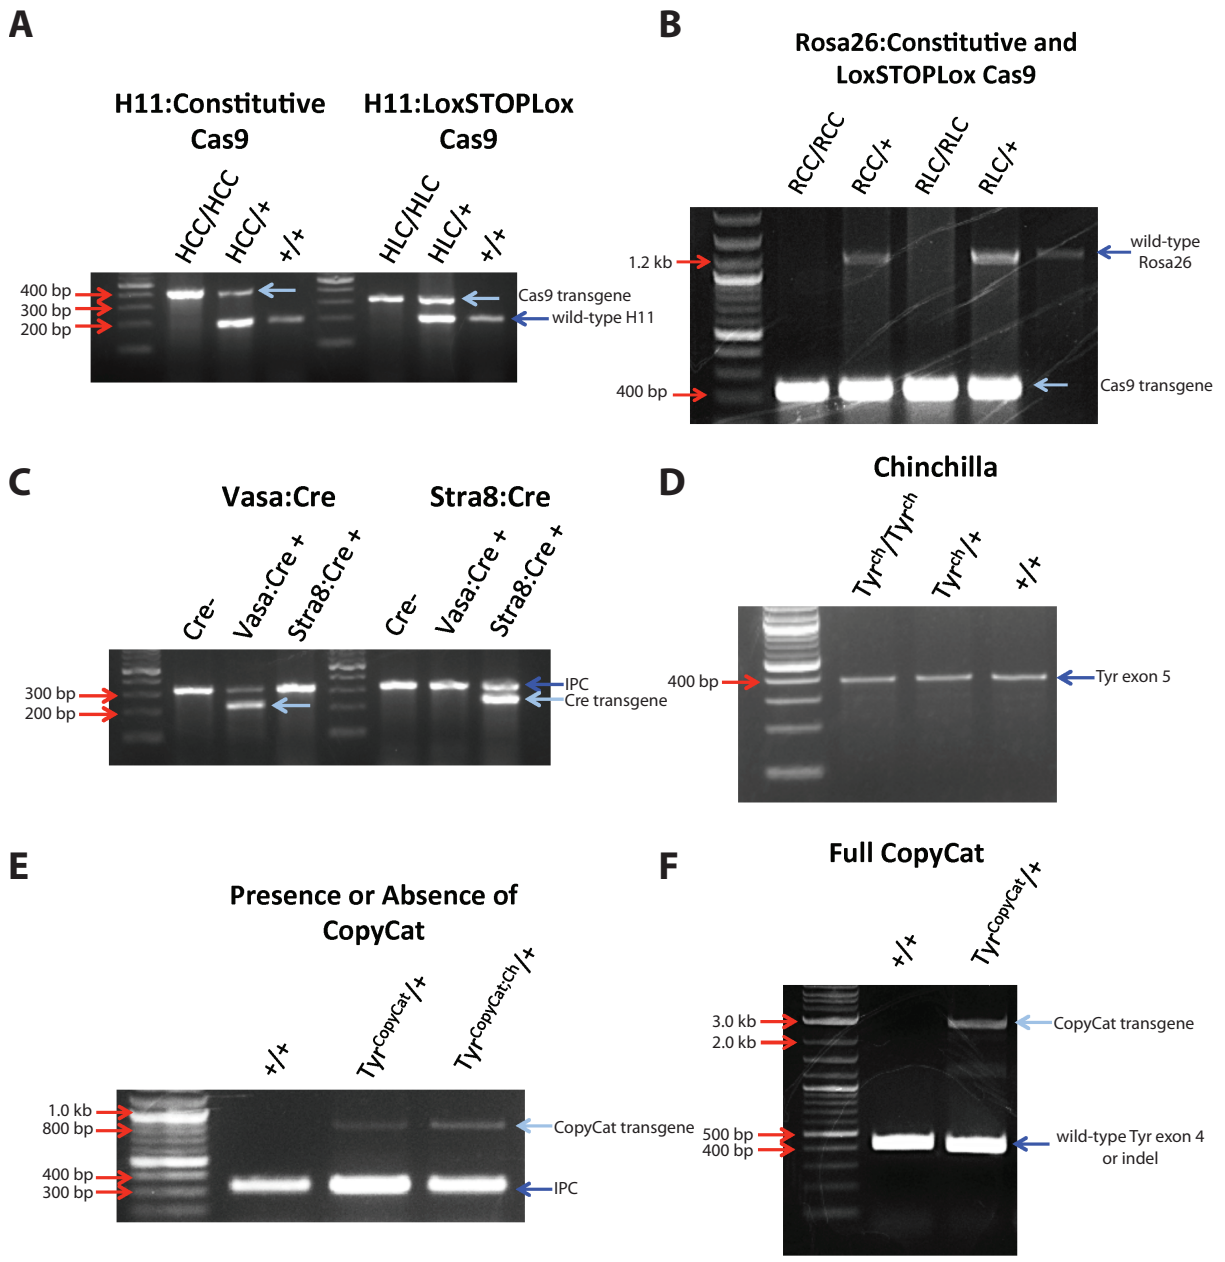

**Supplementary Fig. 3.**

Sample genotype results using primers as indicated in Supplementary Table 3. Each Cre and Cas9 PCR is representative of dozens of individuals with similar results. *Tyr<sup>Chinchilla</sup>* and *Tyr<sup>CopyCat</sup>* PCR results are representative of hundreds of individuals with similar results. All primary data for each of these *Tyr* alleles from F3 offspring of the constitutive crosses and F4 offspring of the germline crosses is accessible through a link provided in the “Data Accessibility” statement in the online version of the manuscript. For all: dark blue arrows indicate the wild type alleles or internal positive controls (IPC, amplifies *interleukin2* on chromosome 3), light blue arrows indicate transgenes. Red arrows denote relevant size markers in the DNA ladder for comparison.

(A) Genotyping for constitutive *H11-Cas9* (HCC) and *H11-LoxSTOPLox-Cas9* (HLC). Right- HCC: Band at 425 bp indicates the *Cas9* transgene. The band at 200 bp indicates the wild type (non-transgenic) *H11* allele. Left- HLC: The band at 350 bp indicates the *LoxSTOPLox-Cas9* transgene. The band at 200 bp indicates wild type (non-transgenic) *H11* allele.

(B) Genotyping for constitutive *Rosa26-Cas9* (RCC) or *Rosa26-LoxSTOPLox-Cas9* (RLC). The band at 1.2 kb indicates wild type (non-transgenic) *Rosa26* allele. The bands at 220 bp indicate each respective *Cas9* transgene.

(C) Genotyping for *Vasa-Cre* and *Stra8-Cre*. This genotyping strategy identifies presence or absence of the *Cre* transgene but not copy number. In both cases, an internal positive control at 324 bp (IPC) confirms successful amplification. Left: *Vasa-Cre* primers only amplify the *Vasa-Cre* transgene. Right: *Stra8-Cre* primers only amplify the *Stra8-Cre* transgene. Each primer pair contains a primer specific to the regulatory sequence and a primer within *Cre*.

(D) Genotyping for *Tyr<sup>chinchilla</sup>*. The *Tyr<sup>chinchilla</sup>* primers flank the SNP and therefore amplify a 392 bp product regardless of *Tyr<sup>chinchilla</sup>* genotype. This amplicon was gel purified and Sanger sequenced to reveal the genotype as in Supplementary Figure 4.

(E) Genotyping to determine presence of *Tyr<sup>CopyCat</sup>* transgene. This strategy identifies presence or absence of the transgene but not copy number. An internal positive control (IPC) at 324 bp confirms successful amplification. The band at 838 bp indicates the presence of the *Tyr<sup>CopyCat</sup>* transgene in animals that inherit the original *Tyr<sup>CopyCat</sup>* chromosome and also in animals that copy the *Tyr<sup>CopyCat</sup>* allele to the *Tyr<sup>chinchilla</sup>* marked chromosome by homology directed repair (HDR).

(F) Genotyping to amplify *Tyr* exon 4 which can include the *Tyr<sup>CopyCat</sup>* transgene. The band at 2606 bp is an amplicon that includes the *Tyr<sup>CopyCat</sup>* transgene. The band at approximately 400 bp is the non-transgenic allele that was gel purified and Sanger sequenced to reveal NHEJ indels in individuals that inherited *Cas9* and did not repair double strand breaks (DSBs) by HDR.

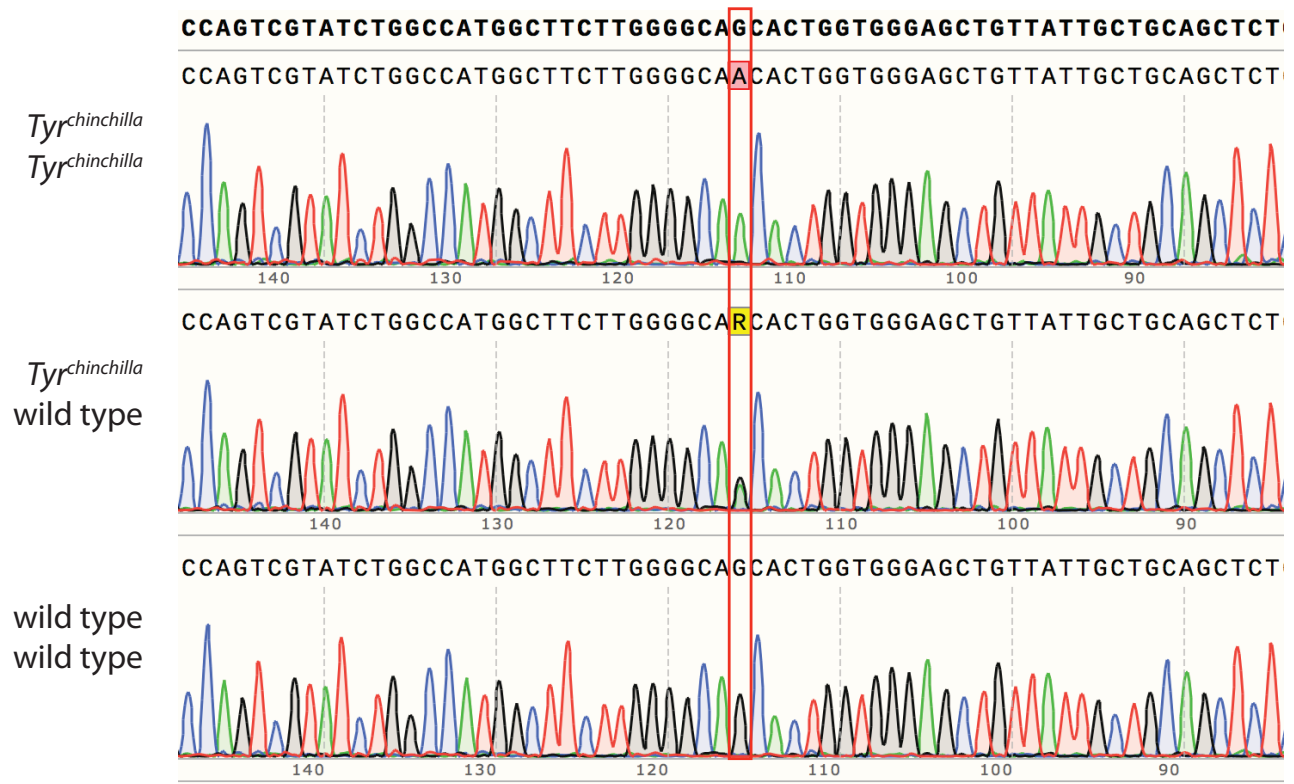

**Supplementary Fig. 4.**

**Sanger sequencing traces of *Tyr* exon 5, which differentiate individuals that are wild type, heterozygous, and homozygous for the *Tyr<sup>chinchilla</sup>* single nucleotide polymorphism.** Sequence traces represent hundreds of F3 offspring of constitutive strategies and F4 offspring of germline crosses with similar results. All primary sequence traces for these individuals are available through a link provided in the “Data Accessibility” statement in the online version of the manuscript. The *Tyr<sup>chinchilla</sup>* region was PCR amplified from tail tip genomic DNA using Chinchilla L3 and Chinchilla R1 primers. The gel purified product was subsequently Sanger sequenced using the Chinchilla R1 primer.

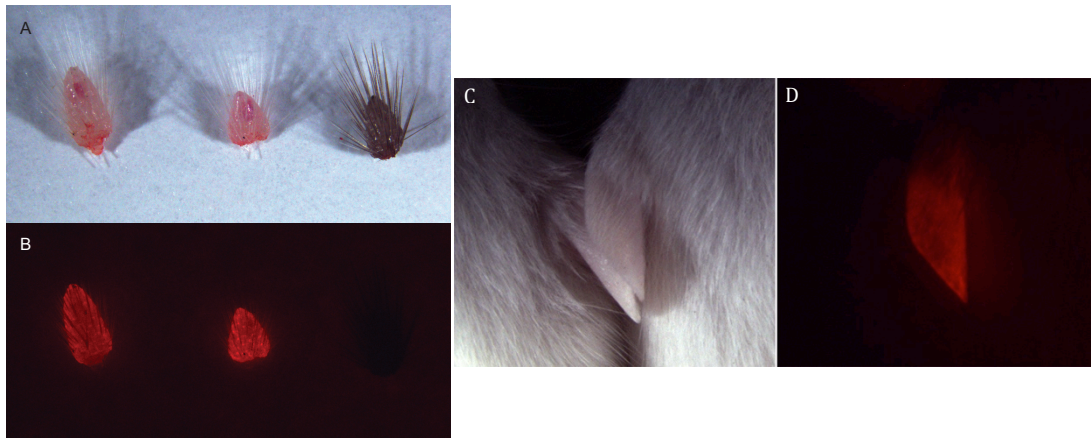

**Supplementary Fig. 5.**

**mCherry fluorescence marks *Tyr<sup>CopyCat</sup>* tails and ears.** (A and B) Two tail tips from F2 mice of the *Rosa26-Cas9* lineage with *Tyr<sup>CopyCat</sup>* (left and middle) and one from a mouse that did not inherit the *Tyr<sup>CopyCat</sup>* transgene (right, *Tyr<sup>WT/chinchilla</sup>*). mCherry is visible only in tails with an allele of the *Tyr<sup>CopyCat</sup>* transgene. (C and D) F3 offspring of the constitutive *Rosa26-Cas9* lineage. The right mouse inherited the original *Tyr<sup>CopyCat</sup>* transgene with mCherry fluorescence in an outcross to CD-1 *Tyr<sup>null</sup>*. The left mouse inherited the *Tyr<sup>chinchilla</sup>*-marked recipient chromosome with an NHEJ mutation and no mCherry fluorescence. Fluorescent images are consistent with the *Tyr<sup>CopyCat</sup>* genotype and representative of hundreds of animals in all constitutive and germline conditional strategies with similar results.

**Supplementary Table 1.**

Primers that were used for cloning the *Tyr<sup>CopyCat</sup>* transgene.

|             |                                                              |
|-------------|--------------------------------------------------------------|
| <b>V851</b> | CCAGCTAGCAGAGGGCCTATTTCCC                                    |
| <b>V852</b> | GAGCTCGAATTCCTGGCCGTC                                        |
| <b>V853</b> | TAGGCCCTCTGCTAGCTGGGACATTGATTATTGACTAGTTATTAATAGTAATCAATTACG |
| <b>V854</b> | TGTAAAACGACGGCCAGTGAATTCGAGCTCCCATAGAGCCCACCGCAT             |
| <b>V875</b> | GTTATGGCCGATAGGTGCATGTTTTAGAGCTAGAAATAGCAAGTTAAAATAAGG       |
| <b>V878</b> | GGTGTTCGTCCTTTCCACAAG                                        |

**Supplementary Table 2.**

Mouse stocks that were used in this study.

| Jackson Labs Stock Number | Jackson Labs Stock Name                               | Notes                            |
|---------------------------|-------------------------------------------------------|----------------------------------|
| 26175                     | B6J.129(B6N)-Gt(ROSA)26Sortm1(CAG-cas9*,-EGFP)Fezh/J  | Rosa-loxSTOPlox-Cas9             |
| 26179                     | B6J.129(Cg)-Gt(ROSA)26Sortm1.1(CAG-cas9*,-EGFP)Fezh/J | Rosa constitutive Cas9           |
| 26816                     | B6;129-Igs2tm1(CAG-cas9*)Mmw/J                        | H11-loxSTOPlox-Cas9              |
| 27650                     | STOCK Igs2tm1.1(CAG-cas9*)Mmw/J                       | H11 constitutive Cas9            |
| 17490                     | B6.FVB-Tg(Stra8-icre)1Reb/LguJ                        | Stra8-Cre                        |
| 6954                      | FVB-Tg(Ddx4-cre)1Dcas/J                               | Vasa-Cre                         |
| 4828                      | FVB.129P2-Pde6b+ Tyrc-ch/AntJ                         | Tyrosinase <sup>chinchilla</sup> |

**Supplementary Table 3.**

PCR primers that were used for genotyping in this study.

| Primer Name   | Primer Sequence              | Amplicon                  | Amplicon Length                    | Polymerase | Annealing Temp | Elongation Time | Sequencing Primer | Notes                                                                                      |
|---------------|------------------------------|---------------------------|------------------------------------|------------|----------------|-----------------|-------------------|--------------------------------------------------------------------------------------------|
| Chinchilla L3 | GGGAGGAAAGGGTGGCTGAG         | Chinchilla SNP            | 392bp                              | MV-Taq     | 60             | 1'              | Chinchilla R1     | SNP G>A at position 252                                                                    |
| Chinchilla R1 | CAGCAAGCTGTGTAGTCT           |                           |                                    |            |                |                 |                   |                                                                                            |
| EGFP L1       | ACATGAAGCAGCAGCAGCTTCT       | EGFP                      | 220bp                              | MV-Taq     | 60             | 45"             |                   | Indicates presence of Rosa26-Cas9 and Rosa26-loxSTOPloxCas9                                |
| EGFP R1       | ACGTTTGTGGCTGTTGTAGTTGT      |                           |                                    |            |                |                 |                   |                                                                                            |
| RLC-WT F*     | GTTCCGTGCAGTTGATGTCATC       | RLC-WT                    | ~1200bp                            | MV-Taq     | 60             | 45"             |                   | Indicates presence of Rosa26 wild type allele                                              |
| RLC-WT R*     | GGACTGAGAATAGGCCCAATG        |                           |                                    |            |                |                 |                   |                                                                                            |
| HCC-Tg-F*     | GGCGAACGTGCTGTTATTG          | HCC-Tg                    | 425bp                              | MV-Taq     | 60             | 10"             |                   | Indicates presence of H11-Cas9 allele                                                      |
| HCC-Tg-R*     | CCAGGCCGATGCTGTACTTC         |                           |                                    |            |                |                 |                   |                                                                                            |
| HG-WT-F*      | GGGGCTTCGAAGTCTTGACAGTAGAT   | HLC-WT                    | 200bp                              | MV-Taq     | 60             | 10"             |                   | Indicates presence of H11 wild type allele                                                 |
| HG-Common-R*  | CTGACCAGTGGGACTGCTTTTCAG     |                           |                                    |            |                |                 |                   |                                                                                            |
| HLC-Cas9-F*   | CGGCCGCACCTCCAGCATGTA        | HLC-Tg                    | 350bp                              | MV-Taq     | 60             | 10"             |                   | Indicates presence of H11-loxSTOPloxCas9 allele                                            |
| HG-Common-R*  | CTGACGCAAGTGGGACTGCTTTTCAG   | HLC-WT                    | 200bp                              | MV-Taq     | 60             | 10"             |                   | Indicates presence of H11 wild type allele                                                 |
| HG-WT-F*      | GGGGCTCCAAAGTCTTGACAGTAGAT   |                           |                                    |            |                |                 |                   |                                                                                            |
| HLC-Common-R* | CTGACGCAAGTGGGACTGCTTTTCAG   |                           |                                    |            |                |                 |                   |                                                                                            |
| Stras8-Cre F* | AGATGCGCAGGATCAGGAACCTG      | Stras8-Cre                | 236bp                              | MV-Taq     | 60             | 10"             |                   | Indicates presence of Stras8-Cre                                                           |
| Stras8-Cre R* | ATCAGGCCACACAGACAGCAGATTC    | Internal Positive Control | 324bp                              | MV-Taq     | 60             | 10"             |                   | Internal Positive Control confirms PCR success                                             |
| IPC F*        | CTAGGGCCAGCAATTTGAAGAATCT    |                           |                                    |            |                |                 |                   |                                                                                            |
| IPC R*        | GTAGGTGAAATTTCTAGCATCATCC    |                           |                                    |            |                |                 |                   |                                                                                            |
| Vasa:Cre F*   | CACGTGCAGCCGTTTAAACCCCGCT    | Vasa:Cre                  | 240bp                              | MV-Taq     | 59             | 10"             |                   | Indicates presence of Vasa:Cre                                                             |
| Vasa:Cre R*   | TTCCCAATTTTAACACAACACCCCTGAA | Internal Positive Control | 324bp                              | MV-Taq     | 59             | 10"             |                   | Internal Positive Control confirms PCR success                                             |
| IPC F*        | CTAGGGCCAGCAATTTGAAGAATCT    |                           |                                    |            |                |                 |                   |                                                                                            |
| IPC R*        | GTAGGTGAAATTTCTAGCATCATCC    |                           |                                    |            |                |                 |                   |                                                                                            |
| Tyr HAL F2    | AATGGCTGGGAAGGCAC            |                           |                                    |            |                |                 |                   |                                                                                            |
| Tyr HAR R2    | GGTTCAAAAAGCTTCCCAATCCT      | CopyCat/NHEJ              | CopyCat: 2606bp<br>NHEJ/WT: ~400bp | Q5         | 64             | 3'              | Tyr HAR R2        | CopyCat band indicates presence of CopyCat. NHEJ/WT band can be sequenced to identify NHEJ |
| cc F1         | TCAATGTCCCGACTAGCAGAGGG      | CopyCat                   | 838bp                              | MV-Taq     | 60             | 1'              |                   | Indicates presence of CopyCat allele                                                       |
| Tyr HAR R2    | GGTTCAAAAAGCTTCCCAATCCT      | Internal Positive Control | 324bp                              | MV-Taq     | 60             | 1'              |                   | Internal Positive Control confirms PCR success                                             |
| IPC F*        | CTAGGGCCAGCAATTTGAAGAATCT    |                           |                                    |            |                |                 |                   |                                                                                            |
| IPC R*        | GTAGGTGAAATTTCTAGCATCATCC    |                           |                                    |            |                |                 |                   |                                                                                            |

\* indicates primers that were designed at the Jackson Laboratory or in citations referenced in the manuscript.  
IPC - internal positive control, amplifies *interleukin2* from chromosome 3.



**Supplementary Table 4.**

Coat color of *Tyr*<sup>CopyCat/chinchilla</sup> F3 individuals that inherited a germline *Cre* transgene and a *loxSTOPlox-Cas9* conditional allele.

|        | Vasa>Cre       |      |             |      | Stra8>Cre      |             |
|--------|----------------|------|-------------|------|----------------|-------------|
|        | Rosa26>LSLCas9 |      | H11>LSLCas9 |      | Rosa26>LSLCas9 | H11>LSLCas9 |
|        | Female         | Male | Female      | Male | Male           | Male        |
| White  | 0              | 0    | 0           | 0    | 0              | 0           |
| Grey   | 3              | 4    | 5           | 4    | 2              | 1           |
| Mosaic | 2              | 1    | 0           | 1    | 0              | 0           |
